# Supplementary material
Source: Springer Nature journal article supplement (https://www.springermedizin.de/resource/supplementary/12931_2014_1508_MOESM4_ESM.pdf/9426354)

**A** *H. influenzae*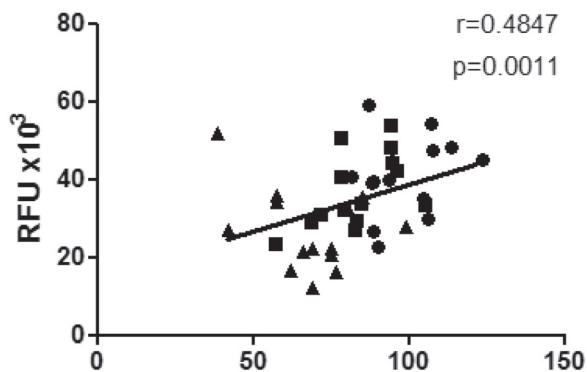**B** *S. aureus*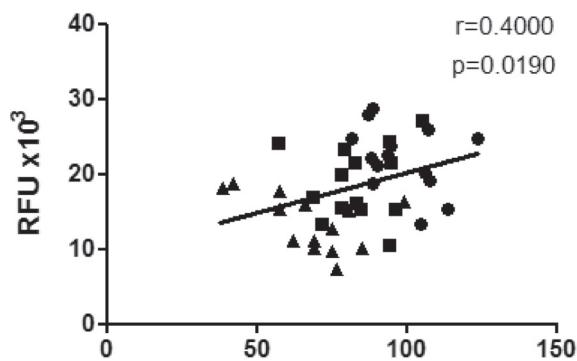**C** *H. influenzae*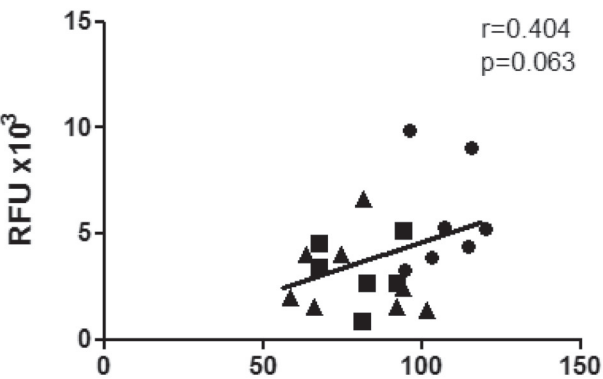**D** *S. aureus*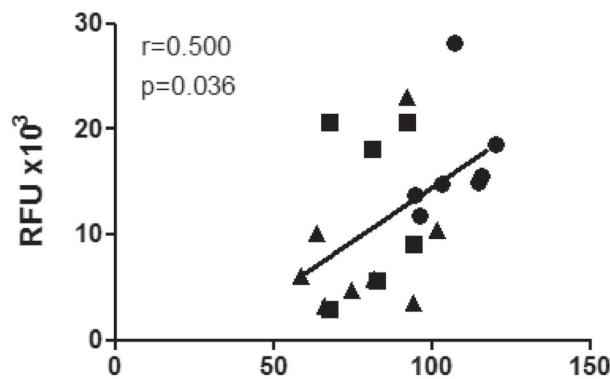FEV<sub>1</sub> (% predicted)FEV<sub>1</sub> (% predicted)

Supplement: MOESM4 [file 9426354]
